# Supplementary material for: Divergent role of PIDA and PIFA in the AlX 3 (X = Cl, Br) halogenation of 2-naphthol: a mechanistic study
Source: publisher site journal article supplement (doi:10.3762/bjoc.20.141), 2024-07-15
Supplement: Additional file 1 [file 1860-5397-20-141-S1.pdf]

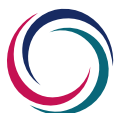

## Supporting Information

for

### **Divergent role of PIDA and PIFA in the $\text{AlX}_3$ (X = Cl, Br) halogenation of 2-naphthol: a mechanistic study**

Kevin A. Juárez-Ornelas, Manuel Solís-Hernández, Pedro Navarro-Santos,  
J. Oscar C. Jiménez-Halla and César R. Solorio-Alvarado

*Beilstein J. Org. Chem.* **2024**, *20*, 1580–1589. [doi:10.3762/bjoc.20.141](https://doi.org/10.3762/bjoc.20.141)

### **Optimized Cartesian coordinates of all structures and alternative mechanisms**

| INDEX                                                                                                                                                             | PAGE       |
|-------------------------------------------------------------------------------------------------------------------------------------------------------------------|------------|
| <b>1. Computational details</b>                                                                                                                                   | <b>S1</b>  |
| <b>2. Reaction mechanism for the chlorination of 2-naphthol using the PIFA-AlCl<sub>3</sub> (1:2) system. Geometries of intermediates and transitions states.</b> | <b>S2</b>  |
| <b>3. Reaction mechanism for the bromination of 2-naphthol using the PIDA-AlCl<sub>3</sub> (1:2) system. Geometries of intermediates and transitions states.</b>  | <b>S5</b>  |
| <b>4. Alternative mechanisms explored for the chlorination of 2-naphthol</b>                                                                                      |            |
| a. The PIFA-AlCl <sub>3</sub> (1:1) system                                                                                                                        | <b>S11</b> |
| b. The PIFA-AlCl <sub>3</sub> (1:2) system via the formation of PhICl <sub>2</sub>                                                                                | <b>S13</b> |
| c. The PIDA-AlCl <sub>3</sub> (1:2) system via the formation of PhICl <sub>2</sub>                                                                                | <b>S15</b> |
| <b>5. Alternative mechanisms explored for the bromination of 2-naphthol</b>                                                                                       |            |
| a. The PIFA-AlBr <sub>3</sub> (1:2) system                                                                                                                        | <b>S18</b> |
| b. The PIFA-AlBr <sub>3</sub> (1:2) system via the formation of PhIBr <sub>2</sub>                                                                                | <b>S21</b> |
| c. The PIDA-AlBr <sub>3</sub> (1:2) system via the formation of PhIBr <sub>2</sub>                                                                                | <b>S24</b> |

## 1. Computational details

The geometric optimization of reagents, adducts, transition states, and products was carried out employing the Gaussian 16 software at the gas phase. The potential energy surface was explored by using DFT calculations at the level of theory  $\omega$ -B97XD/(6-311G(d,p),LANL08d)// $\omega$ -B97XD/6-31G(d). Once the critical points were found, the solvent effects were considered by performing energy calculations over each geometry using the polarizable continuum model (PCM) using the SMD proposed model of Truhlar and coworkers<sup>2</sup>. The geometries of the critical points of the proposed mechanisms are the following:

## 2. Reaction mechanism for the chlorination of 2-naphthol using the PIFA- $\text{AlCl}_3$ (1:2) system. Geometries of intermediates and transition states.

Reagents

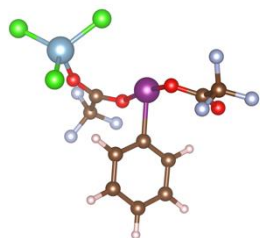

|    |           |           |           |
|----|-----------|-----------|-----------|
| I  | -0.715876 | -0.166764 | -0.538108 |
| C  | -1.140209 | 1.555499  | 0.561082  |
| C  | -0.766600 | 1.570977  | 1.899351  |
| C  | -1.759824 | 2.623374  | -0.075213 |
| C  | -1.036188 | 2.721874  | 2.629104  |
| H  | -0.277442 | 0.721290  | 2.361566  |
| C  | -2.016728 | 3.760240  | 0.678462  |
| H  | -2.046658 | 2.567005  | -1.116950 |
| C  | -1.656011 | 3.807506  | 2.021096  |
| H  | -0.757162 | 2.764636  | 3.675395  |
| H  | -2.500769 | 4.609976  | 0.211430  |
| H  | -1.860619 | 4.701650  | 2.599260  |
| O  | 3.006426  | -0.042313 | -0.092155 |
| C  | 2.423303  | 0.886642  | -0.684759 |
| O  | 1.223533  | 1.005913  | -0.988438 |
| C  | 3.334480  | 2.083058  | -1.061627 |
| F  | 3.616245  | 2.766678  | 0.050565  |
| F  | 4.468417  | 1.651033  | -1.597470 |
| F  | 2.736673  | 2.898461  | -1.919193 |
| O  | -3.644695 | 0.406992  | -1.415822 |
| C  | -3.606185 | -0.509040 | -0.650179 |
| O  | -2.536362 | -1.013560 | -0.058681 |
| C  | -4.869255 | -1.280262 | -0.191760 |
| F  | -4.743266 | -2.579965 | -0.449764 |
| F  | -5.938139 | -0.820118 | -0.822479 |
| F  | -5.043994 | -1.120102 | 1.121006  |
| Al | 2.780476  | -1.774238 | 0.543400  |
| Cl | 1.697535  | -2.708838 | -1.055279 |
| Cl | 4.702110  | -2.545019 | 0.884673  |
| Cl | 1.573446  | -1.499104 | 2.286387  |

TS1-Cl

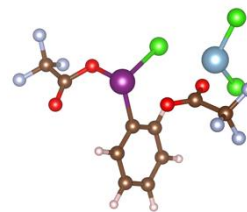

|    |           |           |           |
|----|-----------|-----------|-----------|
| I  | 0.867926  | -0.159466 | -1.021628 |
| C  | 0.694023  | -1.483450 | 0.581382  |
| C  | 0.217869  | -1.017159 | 1.799471  |
| C  | 1.012398  | -2.816849 | 0.344727  |
| C  | 0.043568  | -1.942112 | 2.820456  |
| H  | 0.009598  | 0.031669  | 1.964762  |
| C  | 0.820363  | -3.720356 | 1.379397  |
| H  | 1.407531  | -3.139729 | -0.609496 |
| C  | 0.334847  | -3.284277 | 2.608468  |
| H  | -0.330675 | -1.601509 | 3.778661  |
| H  | 1.055962  | -4.766476 | 1.222785  |
| H  | 0.187757  | -3.999338 | 3.410234  |
| O  | -2.313161 | 0.208681  | -0.182512 |
| C  | -2.453519 | -0.763364 | -0.994159 |
| O  | -1.570775 | -1.297069 | -1.640042 |
| C  | -3.899886 | -1.303442 | -1.086975 |
| F  | -4.224307 | -1.879974 | 0.074207  |
| F  | -4.750336 | -0.302215 | -1.310876 |
| F  | -4.024658 | -2.197042 | -2.055060 |
| O  | 3.778498  | -1.244551 | -0.701749 |
| C  | 3.709395  | -0.078956 | -0.473453 |
| O  | 2.622284  | 0.692298  | -0.488854 |
| C  | 4.933690  | 0.794107  | -0.090396 |
| F  | 5.104354  | 1.759652  | -0.991887 |
| F  | 6.023027  | 0.042866  | -0.056945 |
| F  | 4.753584  | 1.347193  | 1.104807  |
| Al | -2.301016 | 1.768595  | 0.670258  |
| Cl | 0.261620  | 2.178457  | 0.502380  |
| Cl | -3.285943 | 3.254403  | -0.410357 |
| Cl | -2.679402 | 1.438983  | 2.705595  |

I-1-Cl

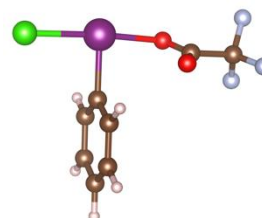

|   |          |           |           |
|---|----------|-----------|-----------|
| I | 0.852585 | -1.184867 | -0.109129 |
| C | 1.191965 | 0.884745  | -0.062962 |

|    |           |           |           |
|----|-----------|-----------|-----------|
| C  | 1.569170  | 1.515612  | -1.239357 |
| C  | 1.019383  | 1.555982  | 1.137760  |
| C  | 1.785888  | 2.886927  | -1.201403 |
| H  | 1.695957  | 0.962108  | -2.161467 |
| C  | 1.242249  | 2.927528  | 1.149535  |
| H  | 0.699991  | 1.036390  | 2.030850  |
| C  | 1.623616  | 3.587812  | -0.011968 |
| H  | 2.081221  | 3.404307  | -2.107002 |
| H  | 1.111348  | 3.476550  | 2.074873  |
| H  | 1.794016  | 4.658479  | 0.008927  |
| O  | -1.214276 | -0.690183 | -0.577445 |
| C  | -1.952988 | -0.245541 | 0.394579  |
| O  | -1.636009 | -0.040817 | 1.537541  |
| C  | -3.395396 | 0.029854  | -0.099752 |
| F  | -3.388786 | 0.969760  | -1.052173 |
| F  | -3.939851 | -1.077576 | -0.613712 |
| F  | -4.168012 | 0.451323  | 0.893888  |
| Cl | 3.247016  | -1.578880 | 0.282721  |

### I-2-Cl

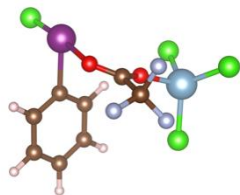

|    |           |           |           |
|----|-----------|-----------|-----------|
| I  | 2.027269  | -0.658431 | -0.918673 |
| C  | 1.875503  | 0.244562  | 0.968834  |
| C  | 1.275935  | 1.491476  | 1.049061  |
| C  | 2.337251  | -0.463836 | 2.070291  |
| C  | 1.134618  | 2.054713  | 2.311096  |
| H  | 0.913577  | 2.009709  | 0.169349  |
| C  | 2.182532  | 0.123731  | 3.318337  |
| H  | 2.795439  | -1.439635 | 1.968420  |
| C  | 1.583280  | 1.373940  | 3.435754  |
| H  | 0.647358  | 3.017356  | 2.405426  |
| H  | 2.529547  | -0.402223 | 4.200199  |
| H  | 1.458043  | 1.818968  | 4.416210  |
| O  | -1.133595 | -0.242164 | -0.306512 |
| C  | -0.881373 | -1.425882 | -0.008280 |
| O  | 0.233160  | -1.965388 | -0.129053 |
| C  | -2.020813 | -2.329147 | 0.527787  |
| F  | -2.938965 | -1.603334 | 1.150489  |
| F  | -2.587207 | -2.957914 | -0.500998 |
| F  | -1.543317 | -3.234106 | 1.373209  |
| Cl | 3.942469  | 0.614603  | -1.554066 |
| Al | -2.258618 | 1.231679  | -0.493219 |
| Cl | -4.015448 | 0.532184  | -1.429718 |
| Cl | -2.454652 | 1.983380  | 1.482797  |
| Cl | -1.032364 | 2.474664  | -1.723433 |

### I-3-Cl (cation)

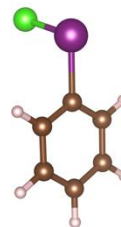

|    |          |           |           |
|----|----------|-----------|-----------|
| I  | 2.045080 | -0.544362 | -0.932900 |
| C  | 1.849314 | 0.285537  | 0.957253  |
| C  | 1.212787 | 1.522985  | 1.070145  |
| C  | 2.351464 | -0.430513 | 2.045543  |
| C  | 1.076734 | 2.055656  | 2.342357  |
| H  | 0.837028 | 2.056360  | 0.205417  |
| C  | 2.198486 | 0.131428  | 3.303142  |
| H  | 2.844324 | -1.387572 | 1.924856  |
| C  | 1.567058 | 1.364408  | 3.447618  |
| H  | 0.587914 | 3.014215  | 2.467647  |
| H  | 2.576178 | -0.396345 | 4.170480  |
| H  | 1.454682 | 1.792891  | 4.436848  |
| Cl | 4.101772 | 0.320243  | -1.598168 |

### I-3-Cl (anion)

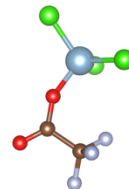

|    |           |           |           |
|----|-----------|-----------|-----------|
| O  | -1.097329 | -0.287438 | -0.413100 |
| C  | -0.794318 | -1.457448 | 0.030496  |
| O  | 0.295522  | -1.961748 | 0.066106  |
| C  | -2.012293 | -2.294438 | 0.511133  |
| F  | -2.907286 | -1.560446 | 1.181417  |
| F  | -2.641185 | -2.840921 | -0.543063 |
| F  | -1.632264 | -3.294603 | 1.312070  |
| Al | -2.174212 | 1.129173  | -0.511512 |
| Cl | -4.052609 | 0.546719  | -1.381173 |
| Cl | -2.428989 | 1.926602  | 1.469360  |
| Cl | -1.188230 | 2.558521  | -1.778665 |

### I-4-Cl (cation)

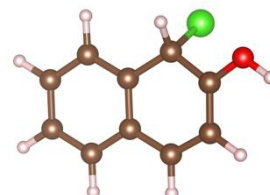

|    |           |           |           |
|----|-----------|-----------|-----------|
| Cl | 1.491701  | -1.665900 | 0.852624  |
| C  | -2.825305 | -1.045598 | -0.419419 |
| C  | -1.468078 | -1.297089 | -0.620586 |
| C  | -0.539203 | -0.316673 | -0.331131 |
| C  | -0.973723 | 0.932295  | 0.160701  |

|   |           |           |           |
|---|-----------|-----------|-----------|
| C | -2.344306 | 1.168715  | 0.366019  |
| C | -3.265300 | 0.179160  | 0.078484  |
| C | 0.929591  | -0.579924 | -0.484648 |
| C | -0.019178 | 1.958882  | 0.393415  |
| C | 1.803220  | 0.634196  | -0.378810 |
| H | 1.156781  | -1.106158 | -1.413041 |
| H | -3.547738 | -1.818830 | -0.655623 |
| H | -1.147181 | -2.263427 | -0.995129 |
| H | -2.672842 | 2.131592  | 0.743344  |
| H | -4.322793 | 0.355291  | 0.233204  |
| H | -0.378931 | 2.908698  | 0.780457  |
| C | 1.329283  | 1.837718  | 0.122337  |
| H | 2.000473  | 2.676871  | 0.270241  |
| O | 3.022647  | 0.427744  | -0.767454 |
| H | 3.610122  | 1.184229  | -0.636596 |

### I-4-Cl (anion)

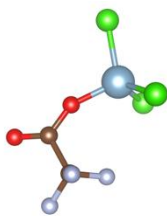

|    |           |           |           |
|----|-----------|-----------|-----------|
| O  | -1.097329 | -0.287438 | -0.413100 |
| C  | -0.794318 | -1.457448 | 0.030496  |
| O  | 0.295522  | -1.961748 | 0.066106  |
| C  | -2.012293 | -2.294438 | 0.511133  |
| F  | -2.907286 | -1.560446 | 1.181417  |
| F  | -2.641185 | -2.840921 | -0.543063 |
| F  | -1.632264 | -3.294603 | 1.312070  |
| Al | -2.174212 | 1.129173  | -0.511512 |
| Cl | -4.052609 | 0.546719  | -1.381173 |
| Cl | -2.428989 | 1.926602  | 1.469360  |
| Cl | -1.188230 | 2.558521  | -1.778665 |

### TS2-Cl

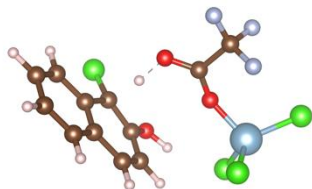

|   |           |          |           |
|---|-----------|----------|-----------|
| O | 1.228023  | 0.201738 | -0.429031 |
| C | 0.623347  | 1.296799 | -0.538860 |
| O | -0.572370 | 1.429136 | -0.831059 |
| C | 1.429970  | 2.600198 | -0.316478 |

|    |           |           |           |
|----|-----------|-----------|-----------|
| F  | 2.283367  | 2.762999  | -1.324403 |
| F  | 0.634134  | 3.654705  | -0.251051 |
| F  | 2.117037  | 2.508666  | 0.820956  |
| Cl | -2.641515 | -0.543891 | -2.718478 |
| Al | 2.624709  | -0.724788 | 0.358952  |
| Cl | 4.464979  | 0.153428  | -0.150008 |
| Cl | 2.091818  | -0.758599 | 2.414495  |
| Cl | 2.373773  | -2.680380 | -0.531502 |
| C  | -4.737966 | 0.807613  | 2.054905  |
| C  | -3.653472 | 0.023929  | 2.363250  |
| C  | -2.831784 | -0.491315 | 1.340939  |
| C  | -3.123299 | -0.191252 | -0.009550 |
| C  | -4.230075 | 0.616067  | -0.304455 |
| C  | -5.024659 | 1.097779  | 0.713199  |
| H  | -1.502225 | -1.550068 | 2.682323  |
| H  | -5.370877 | 1.200722  | 2.842083  |
| H  | -3.416852 | -0.209090 | 3.396386  |
| C  | -1.725331 | -1.339414 | 1.641159  |
| C  | -2.179778 | -0.653401 | -1.025184 |
| H  | -4.461817 | 0.854992  | -1.334348 |
| H  | -5.883912 | 1.713084  | 0.469700  |
| C  | -1.212117 | -1.638425 | -0.687921 |
| C  | -0.947639 | -1.903706 | 0.678723  |
| H  | -1.276575 | 0.351687  | -0.913259 |
| H  | -0.134572 | -2.569170 | 0.942194  |
| O  | -0.522110 | -2.178536 | -1.656179 |
| H  | 0.309295  | -2.574690 | -1.335799 |

### I-5-Cl

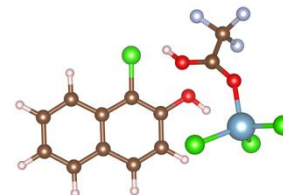

|    |           |           |           |
|----|-----------|-----------|-----------|
| O  | -2.465281 | 0.342861  | -0.433286 |
| C  | -1.677642 | 1.259851  | -0.605200 |
| O  | -0.657865 | 1.177527  | -1.380109 |
| C  | -2.045101 | 2.617193  | 0.046768  |
| F  | -2.264795 | 2.469506  | 1.336800  |
| F  | -1.074566 | 3.510347  | -0.144814 |
| F  | -3.150053 | 3.063340  | -0.540543 |
| Cl | 1.910825  | 2.406771  | -0.056046 |
| Al | -2.535644 | -1.561977 | -0.261858 |
| Cl | -4.433340 | -2.057224 | -1.003924 |
| Cl | -0.851348 | -2.303066 | -1.290962 |
| Cl | -2.304795 | -1.661957 | 1.867237  |
| C  | 5.787370  | -1.249820 | -0.640844 |
| C  | 4.799736  | -1.910871 | 0.035383  |
| C  | 3.590236  | -1.259248 | 0.377093  |
| C  | 3.405047  | 0.099988  | 0.005383  |
| C  | 4.445483  | 0.760356  | -0.693813 |
| C  | 5.603521  | 0.100117  | -1.005120 |
| H  | 2.703526  | -2.970367 | 1.356442  |

|   |           |           |           |
|---|-----------|-----------|-----------|
| H | 6.710554  | -1.757590 | -0.897114 |
| H | 4.928461  | -2.950365 | 0.320570  |
| C | 2.562056  | -1.930212 | 1.083015  |
| C | 2.177907  | 0.720802  | 0.361894  |
| H | 4.322878  | 1.797657  | -0.979272 |
| H | 6.389962  | 0.622622  | -1.539207 |
| C | 1.195720  | 0.052531  | 1.048906  |
| C | 1.400951  | -1.299017 | 1.410912  |
| H | -0.006051 | 1.890680  | -1.238649 |
| H | 0.612897  | -1.829571 | 1.934494  |
| O | 0.034870  | 0.690663  | 1.358412  |
| H | -0.522440 | 0.118545  | 1.900338  |

|    |           |           |           |
|----|-----------|-----------|-----------|
| C  | 3.281358  | -0.121724 | -0.000046 |
| C  | 2.533034  | 1.023815  | -0.000125 |
| C  | 1.118876  | 0.970694  | -0.000095 |
| C  | 0.473112  | -0.295722 | 0.000019  |
| C  | 1.272207  | -1.465259 | 0.000098  |
| C  | 2.638899  | -1.376558 | 0.000067  |
| H  | 0.830149  | 3.114482  | -0.000263 |
| H  | 4.364623  | -0.068251 | -0.000070 |
| H  | 3.016247  | 1.996276  | -0.000214 |
| C  | 0.330671  | 2.150918  | -0.000176 |
| C  | -0.947617 | -0.313546 | 0.000043  |
| H  | 0.792770  | -2.436488 | 0.000186  |
| H  | 3.233417  | -2.284143 | 0.000129  |
| C  | -1.692822 | 0.841796  | -0.000038 |
| C  | -1.029136 | 2.091863  | -0.000150 |
| H  | -1.642481 | 2.985366  | -0.000212 |
| O  | -3.038803 | 0.876993  | -0.000021 |
| H  | -3.388876 | -0.019404 | 0.000038  |
| Cl | -1.809818 | -1.843615 | 0.000176  |

**Product**

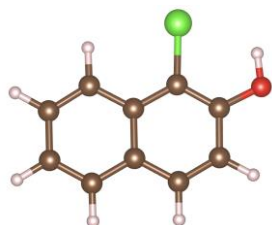

### 3. Reaction mechanism for the bromination of 2-naphthol using the PIDA- $\text{AlCl}_3$ (1:2) system. Geometries of intermediates and transition states.

**Reagents**

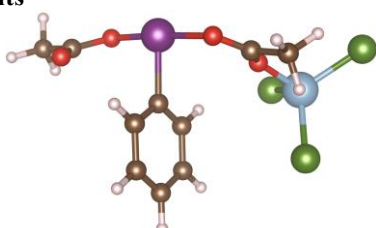

|   |           |           |           |
|---|-----------|-----------|-----------|
| I | -2.263209 | -1.078661 | -0.570870 |
| C | -2.004985 | 0.968363  | -0.226948 |
| C | -1.166625 | 1.355920  | 0.806902  |
| C | -2.664751 | 1.865353  | -1.056092 |
| C | -0.969506 | 2.716756  | 1.004533  |
| H | -0.663594 | 0.631866  | 1.435715  |
| C | -2.450989 | 3.219348  | -0.836415 |
| H | -3.336757 | 1.523444  | -1.832058 |
| C | -1.604145 | 3.640615  | 0.183964  |
| H | -0.296898 | 3.042702  | 1.788830  |
| H | -2.951704 | 3.944965  | -1.467189 |
| H | -1.435951 | 4.700402  | 0.339236  |
| O | 0.882019  | -0.582209 | -0.690706 |
| C | 0.510137  | -0.584914 | -1.902107 |
| O | -0.693305 | -0.800166 | -2.202692 |
| C | 1.487175  | -0.329671 | -3.004545 |
| O | -5.128850 | -0.076648 | -0.381454 |
| C | -4.882754 | -0.654780 | 0.643882  |
| O | -3.691776 | -1.220866 | 0.906801  |
| C | -5.834613 | -0.840485 | 1.793802  |

|    |           |           |           |
|----|-----------|-----------|-----------|
| Al | 2.381537  | -0.140038 | 0.291061  |
| Br | 1.723838  | -0.574236 | 2.456837  |
| Br | 4.089899  | -1.481158 | -0.470007 |
| Br | 2.676693  | 2.109691  | -0.151282 |
| H  | 2.305621  | -1.049589 | -2.935420 |
| H  | 1.001242  | -0.394941 | -3.974606 |
| H  | 1.923136  | 0.663612  | -2.866378 |
| H  | -5.986540 | -1.904701 | 1.982505  |
| H  | -6.784027 | -0.363263 | 1.560900  |
| H  | -5.407810 | -0.405308 | 2.699124  |

**I-1-Br (cation)**

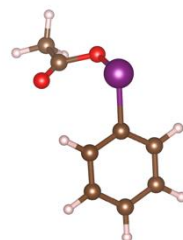

|   |           |           |           |
|---|-----------|-----------|-----------|
| I | -0.610262 | -1.131574 | -0.204055 |
| C | 1.205207  | -0.158329 | -0.024878 |
| C | 1.574307  | 0.747217  | -1.021273 |

|   |           |           |           |
|---|-----------|-----------|-----------|
| C | 2.009720  | -0.465958 | 1.074377  |
| C | 2.811617  | 1.359701  | -0.900886 |
| H | 0.913862  | 0.981175  | -1.846655 |
| C | 3.240905  | 0.164513  | 1.164897  |
| H | 1.693305  | -1.169690 | 1.834684  |
| C | 3.636977  | 1.067980  | 0.182541  |
| H | 3.129458  | 2.069085  | -1.655376 |
| H | 3.891129  | -0.052152 | 2.003862  |
| H | 4.602243  | 1.554325  | 0.263725  |
| O | -1.601929 | 1.541072  | -0.959859 |
| C | -2.115977 | 1.286514  | 0.082208  |
| O | -1.844436 | 0.099420  | 0.753307  |
| C | -3.086537 | 2.097690  | 0.881287  |
| H | -3.256187 | 3.041410  | 0.368127  |
| H | -4.026404 | 1.553472  | 0.987576  |
| H | -2.689913 | 2.275880  | 1.881773  |

**I-1-Br (anion)**

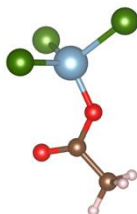

|    |           |           |           |
|----|-----------|-----------|-----------|
| O  | -1.307517 | -0.032026 | 1.146309  |
| C  | -2.590953 | -0.014221 | 0.857457  |
| O  | -3.056461 | 0.031643  | -0.256281 |
| C  | -3.453626 | -0.064595 | 2.104180  |
| H  | -3.270948 | -1.002828 | 2.634457  |
| H  | -3.177060 | 0.747451  | 2.780441  |
| H  | -4.507645 | 0.009927  | 1.838568  |
| Al | 0.111202  | -0.001305 | 0.065304  |
| Br | 0.175272  | -1.896440 | -1.299865 |
| Br | 0.193572  | 1.972242  | -1.181246 |
| Br | 1.936566  | -0.054705 | 1.538469  |

**TS1-Br**

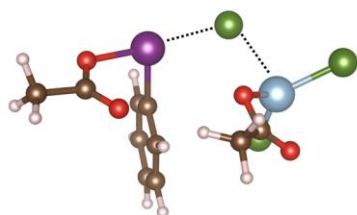

|   |          |           |           |
|---|----------|-----------|-----------|
| I | 1.961573 | -0.835124 | -0.900981 |
| C | 1.668100 | 1.161101  | -0.350960 |
| C | 1.562395 | 2.108924  | -1.359877 |
| C | 1.575465 | 1.470528  | 0.999327  |

|    |           |           |           |
|----|-----------|-----------|-----------|
| C  | 1.364445  | 3.430642  | -0.986687 |
| H  | 1.606212  | 1.830558  | -2.405261 |
| C  | 1.390278  | 2.801931  | 1.344079  |
| H  | 1.654380  | 0.703176  | 1.755651  |
| C  | 1.283096  | 3.774208  | 0.357604  |
| H  | 1.261924  | 4.189303  | -1.753528 |
| H  | 1.303762  | 3.070131  | 2.390370  |
| H  | 1.116492  | 4.808115  | 0.637465  |
| O  | -0.632536 | -0.904713 | 1.132236  |
| C  | -0.886658 | -0.761654 | 2.411009  |
| O  | -1.917681 | -0.190223 | 2.748062  |
| C  | 0.103693  | -1.344110 | 3.371250  |
| O  | 3.383066  | -1.037081 | 1.809891  |
| C  | 4.227358  | -0.965113 | 0.957761  |
| O  | 3.959112  | -0.825758 | -0.353154 |
| C  | 5.713222  | -1.008716 | 1.192297  |
| Al | -2.110200 | -0.150863 | 0.356121  |
| Br | -0.949498 | -0.754623 | -2.101682 |
| Br | -4.000596 | -1.401659 | 0.179612  |
| Br | -2.165812 | 2.123991  | 0.140435  |
| H  | 1.119589  | -1.286242 | 2.979609  |
| H  | 0.024991  | -0.849606 | 4.337911  |
| H  | -0.136236 | -2.402576 | 3.506117  |
| H  | 6.172547  | -0.090810 | 0.821774  |
| H  | 6.152289  | -1.842108 | 0.641500  |
| H  | 5.905928  | -1.121169 | 2.256918  |

**I-2-Br**

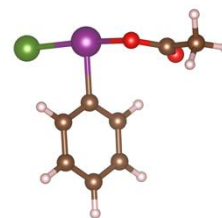

|    |           |           |           |
|----|-----------|-----------|-----------|
| I  | -0.174477 | -0.954267 | -0.218112 |
| C  | 0.148754  | 1.119252  | -0.105694 |
| C  | -0.188113 | 1.899273  | -1.202323 |
| C  | 0.680868  | 1.644891  | 1.061435  |
| C  | 0.021155  | 3.269584  | -1.118337 |
| H  | -0.613275 | 1.459305  | -2.095936 |
| C  | 0.882375  | 3.019100  | 1.120878  |
| H  | 0.954676  | 1.002376  | 1.887231  |
| C  | 0.553288  | 3.826353  | 0.039084  |
| H  | -0.236621 | 3.900618  | -1.961471 |
| H  | 1.299084  | 3.454565  | 2.021998  |
| H  | 0.711639  | 4.897551  | 0.098512  |
| Br | -2.746778 | -0.537175 | 0.277849  |
| O  | 2.503597  | -0.845847 | 1.369149  |
| C  | 2.782976  | -1.067786 | 0.212124  |
| O  | 1.898229  | -1.146310 | -0.768026 |
| C  | 4.193553  | -1.279049 | -0.285219 |
| H  | 4.272890  | -2.246566 | -0.784163 |
| H  | 4.890529  | -1.231494 | 0.549372  |
| H  | 4.441817  | -0.511509 | -1.021009 |



**I-3-Br**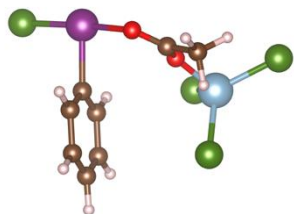

|    |           |           |           |
|----|-----------|-----------|-----------|
| I  | 2.384800  | -0.749225 | 0.792647  |
| C  | 1.784464  | 1.181914  | 0.204222  |
| C  | 1.215556  | 1.334704  | -1.048615 |
| C  | 1.925814  | 2.214956  | 1.117778  |
| C  | 0.762900  | 2.599535  | -1.399180 |
| H  | 1.096482  | 0.501132  | -1.728571 |
| C  | 1.461744  | 3.469566  | 0.741538  |
| H  | 2.369777  | 2.056435  | 2.092549  |
| C  | 0.882792  | 3.658175  | -0.507816 |
| H  | 0.286256  | 2.739319  | -2.361865 |
| H  | 1.550361  | 4.297520  | 1.435484  |
| H  | 0.507406  | 4.636805  | -0.783745 |
| O  | -0.794038 | -0.569885 | 0.792434  |
| C  | -0.484383 | -0.456837 | 2.016344  |
| O  | 0.717521  | -0.529867 | 2.382150  |
| C  | -1.533630 | -0.224725 | 3.056791  |
| Al | -2.259260 | -0.264468 | -0.286362 |
| Br | -1.497494 | -0.786092 | -2.397981 |
| Br | -3.933465 | -1.650639 | 0.472523  |
| Br | -2.695542 | 1.985395  | 0.025894  |
| H  | -2.301755 | -0.996835 | 2.979708  |
| H  | -1.094848 | -0.215807 | 4.051277  |
| H  | -2.021846 | 0.732588  | 2.853319  |
| Br | 4.329494  | -0.819230 | -0.880687 |

**TS2-Br**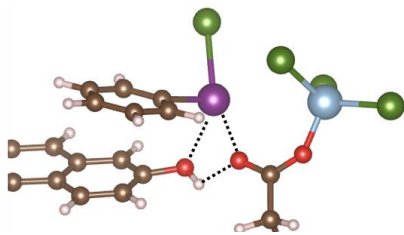

|   |           |           |           |
|---|-----------|-----------|-----------|
| I | -0.271411 | 0.648683  | -0.377844 |
| C | -1.497555 | 0.066728  | 1.227569  |
| C | -1.020030 | -0.916040 | 2.080439  |
| C | -2.749389 | 0.648860  | 1.378195  |
| C | -1.852027 | -1.350248 | 3.107514  |
| H | -0.025040 | -1.326083 | 1.962218  |
| C | -3.560464 | 0.204492  | 2.411684  |
| H | -3.093670 | 1.422777  | 0.704801  |
| C | -3.115921 | -0.797495 | 3.267851  |
| H | -1.496798 | -2.112858 | 3.791403  |
| H | -4.545951 | 0.638226  | 2.536386  |
| H | -3.757349 | -1.142424 | 4.071442  |
| O | 0.441782  | -1.627063 | -0.633867 |

|    |           |           |           |
|----|-----------|-----------|-----------|
| C  | 1.472232  | -2.338248 | -0.696292 |
| O  | 2.655029  | -1.923334 | -0.531716 |
| C  | 1.318781  | -3.799761 | -1.021256 |
| Br | -0.140223 | 3.053040  | 0.463099  |
| C  | -7.903928 | -0.228481 | -0.345065 |
| C  | -7.034698 | -1.203534 | 0.062070  |
| C  | -5.684579 | -1.195397 | -0.367979 |
| C  | -5.240715 | -0.158249 | -1.231611 |
| C  | -6.166140 | 0.835061  | -1.640649 |
| C  | -7.463398 | 0.800776  | -1.206982 |
| H  | -5.092955 | -2.983411 | 0.699326  |
| H  | -8.935420 | -0.243224 | -0.010011 |
| H  | -7.370390 | -1.998075 | 0.721949  |
| C  | -4.757647 | -2.187927 | 0.041374  |
| C  | -3.886865 | -0.135248 | -1.647957 |
| H  | -5.829432 | 1.625127  | -2.304826 |
| H  | -8.162331 | 1.566359  | -1.526360 |
| C  | -3.022384 | -1.094434 | -1.203989 |
| C  | -3.454212 | -2.142272 | -0.360248 |
| H  | -3.525726 | 0.651827  | -2.301663 |
| H  | -2.738707 | -2.880153 | -0.010128 |
| O  | -1.692330 | -0.962837 | -1.514370 |
| H  | -1.186030 | -1.773377 | -1.357128 |
| H  | 1.224366  | -3.901862 | -2.106384 |
| H  | 0.414258  | -4.202383 | -0.564639 |
| H  | 2.193082  | -4.362205 | -0.700090 |
| Al | 3.590180  | -0.401163 | -0.123865 |
| Br | 2.824128  | 0.189379  | 1.982280  |
| Br | 3.006181  | 1.115345  | -1.790892 |
| Br | 5.799009  | -0.988877 | -0.187594 |

**I-4-Br (cation)**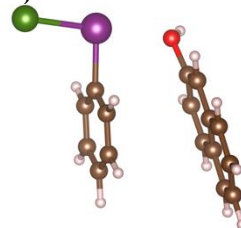

|    |           |           |           |
|----|-----------|-----------|-----------|
| I  | -1.954288 | -0.683216 | 0.391674  |
| C  | -0.704664 | 0.963012  | 0.059542  |
| C  | -0.818622 | 2.061935  | 0.903431  |
| C  | 0.244883  | 0.860615  | -0.949822 |
| C  | 0.074782  | 3.107375  | 0.715180  |
| H  | -1.577182 | 2.115121  | 1.674964  |
| C  | 1.135478  | 1.913647  | -1.102496 |
| H  | 0.307696  | -0.008046 | -1.592000 |
| C  | 1.049198  | 3.027335  | -0.274854 |
| H  | 0.008825  | 3.983436  | 1.349527  |
| H  | 1.901316  | 1.853324  | -1.866387 |
| H  | 1.749601  | 3.844481  | -0.403460 |
| Br | -3.884532 | 0.032863  | -1.044146 |
| C  | 5.442196  | 0.007853  | -1.293970 |
| C  | 4.888260  | 0.559814  | -0.171258 |



|   |          |           |           |
|---|----------|-----------|-----------|
| C | 3.704661 | 0.018233  | 0.388759  |
| C | 3.102047 | -1.111875 | -0.227726 |
| C | 3.703431 | -1.666563 | -1.384908 |
| C | 4.843336 | -1.116691 | -1.905649 |
| H | 3.563105 | 1.431422  | 2.022057  |
| H | 6.348713 | 0.426920  | -1.715823 |
| H | 5.352731 | 1.417167  | 0.305756  |
| C | 3.097324 | 0.577150  | 1.541730  |
| C | 1.905201 | -1.639338 | 0.319087  |
| H | 3.251953 | -2.536748 | -1.851027 |
| H | 5.297812 | -1.548413 | -2.790327 |
| C | 1.344453 | -1.045454 | 1.410486  |
| C | 1.932682 | 0.067865  | 2.043398  |
| H | 1.429815 | -2.503756 | -0.133470 |
| H | 1.458195 | 0.518492  | 2.909956  |
| O | 0.094419 | -1.499838 | 1.832626  |
| H | 0.020096 | -1.443930 | 2.790015  |

**I-4-Br (anion)**

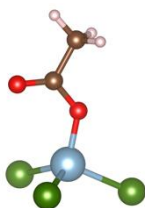

|    |           |           |           |
|----|-----------|-----------|-----------|
| O  | -1.307517 | -0.032026 | 1.146309  |
| C  | -2.590953 | -0.014221 | 0.857457  |
| O  | -3.056461 | 0.031643  | -0.256281 |
| C  | -3.453626 | -0.064595 | 2.104180  |
| H  | -3.270948 | -1.002828 | 2.634457  |
| H  | -3.177060 | 0.747451  | 2.780441  |
| H  | -4.507645 | 0.009927  | 1.838568  |
| Al | 0.111202  | -0.001305 | 0.065304  |
| Br | 0.175272  | -1.896440 | -1.299865 |
| Br | 0.193572  | 1.972242  | -1.181246 |
| Br | 1.936566  | -0.054705 | 1.538469  |

**TS3-Br**

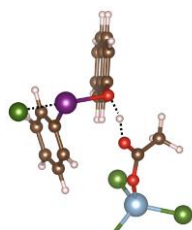

|   |           |           |           |
|---|-----------|-----------|-----------|
| I | -3.312910 | -1.169965 | 0.784849  |
| C | -2.063635 | -0.798769 | -0.857253 |
| C | -0.857326 | -1.482846 | -0.937804 |

|    |           |           |           |
|----|-----------|-----------|-----------|
| C  | -2.435465 | 0.205297  | -1.740508 |
| C  | 0.020706  | -1.120941 | -1.950512 |
| H  | -0.581220 | -2.242615 | -0.219466 |
| C  | -1.541948 | 0.540786  | -2.750307 |
| H  | -3.377850 | 0.728975  | -1.640109 |
| C  | -0.318575 | -0.110768 | -2.845378 |
| H  | 0.978901  | -1.622468 | -2.025943 |
| H  | -1.798728 | 1.332509  | -3.444225 |
| H  | 0.389001  | 0.175625  | -3.614679 |
| O  | 0.039581  | -0.849034 | 1.886981  |
| C  | 1.188485  | -0.352739 | 1.730564  |
| O  | 2.043500  | -1.016760 | 1.084273  |
| C  | 1.546379  | 0.983446  | 2.306978  |
| Br | -4.750184 | -2.900606 | -0.480455 |
| C  | -1.081715 | 5.901326  | -1.209357 |
| C  | -1.999890 | 5.551901  | -0.256301 |
| C  | -1.998150 | 4.251519  | 0.305180  |
| C  | -1.023829 | 3.315399  | -0.131471 |
| C  | -0.085137 | 3.703756  | -1.120178 |
| C  | -0.115966 | 4.966870  | -1.646071 |
| H  | -3.684114 | 4.562127  | 1.626177  |
| H  | -1.090869 | 6.899411  | -1.634032 |
| H  | -2.741891 | 6.269575  | 0.080619  |
| C  | -2.942279 | 3.846619  | 1.284882  |
| C  | -1.027029 | 2.009133  | 0.413469  |
| H  | 0.661161  | 2.985590  | -1.444769 |
| H  | 0.609823  | 5.257565  | -2.397917 |
| C  | -1.954017 | 1.652486  | 1.359443  |
| C  | -2.925268 | 2.582301  | 1.801435  |
| H  | -0.303360 | 1.289429  | 0.044637  |
| H  | -3.637990 | 2.270338  | 2.557023  |
| O  | -1.992764 | 0.385795  | 1.881313  |
| H  | -0.894455 | -0.158225 | 2.003163  |
| H  | 2.419063  | 0.861013  | 2.952938  |
| H  | 0.723163  | 1.417653  | 2.871061  |
| H  | 1.839038  | 1.664307  | 1.504106  |
| Al | 3.573187  | -0.714197 | 0.119753  |
| Br | 5.232885  | -0.239638 | 1.634696  |
| Br | 3.014831  | 1.119449  | -1.212008 |
| Br | 3.833570  | -2.619968 | -1.134628 |

**I-5-Br**

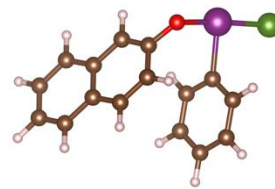

|   |           |          |           |
|---|-----------|----------|-----------|
| I | -1.130467 | 1.637360 | -0.852914 |
| C | -0.537830 | 0.998929 | 1.054520  |
| C | -1.510886 | 0.774940 | 2.016767  |

|    |           |           |           |
|----|-----------|-----------|-----------|
| C  | 0.800281  | 0.692581  | 1.255812  |
| C  | -1.117164 | 0.226017  | 3.230575  |
| H  | -2.549348 | 1.021709  | 1.832825  |
| C  | 1.170237  | 0.130537  | 2.470275  |
| H  | 1.538393  | 0.867376  | 0.484125  |
| C  | 0.215225  | -0.101982 | 3.451824  |
| H  | -1.858658 | 0.050047  | 4.001773  |
| H  | 2.207413  | -0.135226 | 2.638173  |
| H  | 0.511040  | -0.541603 | 4.397979  |
| Br | -0.798485 | 4.174283  | -0.089292 |
| C  | 3.632352  | -3.973419 | 0.282147  |
| C  | 2.357495  | -3.938245 | 0.779244  |
| C  | 1.381870  | -3.078722 | 0.217817  |
| C  | 1.739734  | -2.247425 | -0.877878 |
| C  | 3.067432  | -2.310768 | -1.374617 |
| C  | 3.989281  | -3.149244 | -0.808577 |
| H  | -0.227846 | -3.656010 | 1.545016  |
| H  | 4.372314  | -4.634232 | 0.721208  |
| H  | 2.076711  | -4.573274 | 1.614711  |
| C  | 0.054211  | -3.014662 | 0.714992  |
| C  | 0.774150  | -1.367307 | -1.424149 |
| H  | 3.343247  | -1.679879 | -2.214685 |
| H  | 5.001386  | -3.184793 | -1.198383 |
| C  | -0.496188 | -1.301105 | -0.902336 |
| C  | -0.856179 | -2.153990 | 0.175806  |
| H  | 1.046188  | -0.718633 | -2.252426 |
| H  | -1.867562 | -2.085376 | 0.560709  |
| O  | -1.417142 | -0.420344 | -1.349052 |

#### TS4-Br

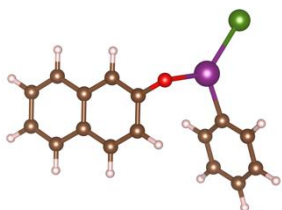

|    |           |           |           |
|----|-----------|-----------|-----------|
| I  | -1.766399 | -0.546019 | -2.555653 |
| C  | -2.942029 | -1.006139 | -0.884129 |
| C  | -4.275265 | -1.371051 | -1.057123 |
| C  | -2.330956 | -1.012690 | 0.367617  |
| C  | -5.010436 | -1.746674 | 0.058262  |
| H  | -4.730896 | -1.361234 | -2.040390 |
| C  | -3.079934 | -1.399375 | 1.470943  |
| H  | -1.291052 | -0.729173 | 0.479682  |
| C  | -4.412732 | -1.763025 | 1.314817  |
| H  | -6.050310 | -2.030762 | -0.056151 |
| H  | -2.619159 | -1.415103 | 2.452005  |
| H  | -4.993208 | -2.062291 | 2.180685  |
| Br | -1.797635 | 2.065318  | -3.563109 |
| C  | 4.053322  | -4.417394 | 0.596885  |
| C  | 2.704444  | -4.631463 | 0.687092  |
| C  | 1.815007  | -4.062345 | -0.256288 |
| C  | 2.339911  | -3.258643 | -1.305071 |
| C  | 3.742664  | -3.056389 | -1.372094 |
| C  | 4.576793  | -3.620771 | -0.446063 |

|   |           |           |           |
|---|-----------|-----------|-----------|
| H | 0.007099  | -4.886634 | 0.603472  |
| H | 4.726119  | -4.858744 | 1.324512  |
| H | 2.298455  | -5.245157 | 1.486221  |
| C | 0.411623  | -4.268164 | -0.192706 |
| C | 1.453669  | -2.675502 | -2.241851 |
| H | 4.145761  | -2.445495 | -2.174228 |
| H | 5.647853  | -3.459889 | -0.510591 |
| C | 0.099250  | -2.904223 | -2.167154 |
| C | -0.422907 | -3.711101 | -1.117321 |
| H | 1.839501  | -2.052269 | -3.042578 |
| H | -1.494645 | -3.879438 | -1.081395 |
| O | -0.739357 | -2.384481 | -3.086239 |

#### I-6-Br

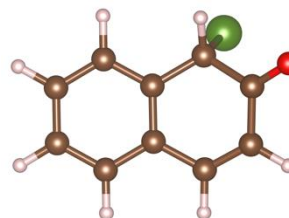

|    |           |           |           |
|----|-----------|-----------|-----------|
| Br | 1.555836  | -1.620144 | 1.136768  |
| C  | -2.840058 | -1.041955 | -0.470293 |
| C  | -1.485001 | -1.293335 | -0.637490 |
| C  | -0.543559 | -0.324508 | -0.312092 |
| C  | -0.964840 | 0.918666  | 0.181459  |
| C  | -2.328614 | 1.157817  | 0.353196  |
| C  | -3.262502 | 0.184368  | 0.031188  |
| C  | 0.919434  | -0.597036 | -0.459100 |
| C  | 0.022585  | 1.957154  | 0.471955  |
| C  | 1.820055  | 0.635555  | -0.524835 |
| H  | 1.149524  | -1.251822 | -1.296275 |
| H  | -3.566505 | -1.804511 | -0.728778 |
| H  | -1.152079 | -2.256691 | -1.011520 |
| H  | -2.656489 | 2.119628  | 0.735795  |
| H  | -4.320369 | 0.381218  | 0.166154  |
| H  | -0.342462 | 2.875623  | 0.924004  |
| C  | 1.319808  | 1.837357  | 0.162666  |
| H  | 2.031097  | 2.638731  | 0.324789  |
| O  | 2.873258  | 0.601446  | -1.112606 |

#### Product

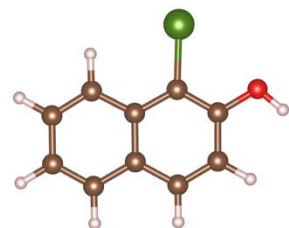

|   |          |           |           |
|---|----------|-----------|-----------|
| C | 3.511048 | -0.859391 | -0.000241 |
| C | 3.134105 | 0.454330  | -0.000328 |

|    |           |           |           |
|----|-----------|-----------|-----------|
| C  | 1.765423  | 0.820195  | -0.000241 |
| C  | 0.768411  | -0.195883 | -0.000073 |
| C  | 1.193438  | -1.549314 | 0.000014  |
| C  | 2.524374  | -1.867740 | -0.000061 |
| H  | 2.130224  | 2.951394  | -0.000436 |
| H  | 4.561717  | -1.128547 | -0.000310 |
| H  | 3.881928  | 1.241736  | -0.000452 |
| C  | 1.368465  | 2.178492  | -0.000306 |
| C  | -0.598928 | 0.199277  | 0.000004  |
| H  | 0.450149  | -2.336341 | 0.000156  |
| H  | 2.823610  | -2.910644 | 0.000025  |
| C  | -0.957302 | 1.527127  | -0.000044 |
| C  | 0.049516  | 2.522336  | -0.000215 |
| H  | -0.243616 | 3.569295  | -0.000288 |
| O  | -2.266093 | 1.864422  | 0.000029  |
| H  | -2.356366 | 2.819031  | 0.000301  |
| Br | -1.990577 | -1.099939 | 0.000278  |

#### 4. Alternative mechanisms explored for the chlorination of 2-naphthol

##### a. The PIFA- $\text{AlCl}_3$ (1:1) system

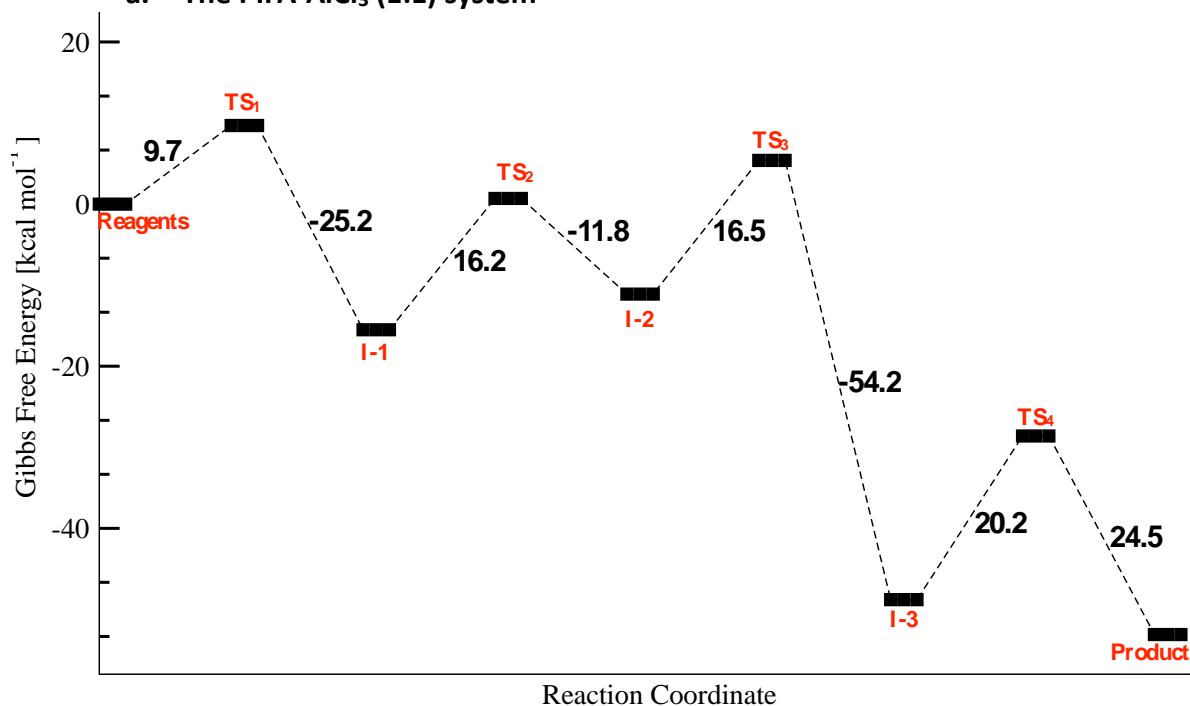

**Figure S1.** Energy profile for the chlorination of 2-naphthol in the presence of PIFA and  $\text{AlCl}_3$  (1:1). Values represent the Gibbs free energy (in kcal/mol).

**Table S1.** Structures of intermediates and transition states with their corresponding Gibbs free energies (in kcal/mol) for the chlorination of 2-naphthol in the presence of PIFA-  $\text{AlCl}_3$  (1:1).

| Step            | Intermediate (I) / Transition State (TS) | $\Delta G$ [kcal/mol] |
|-----------------|------------------------------------------|-----------------------|
| Reagents        |                                          | 0.0                   |
| TS <sub>1</sub> |                                          | 9.7                   |
| I-1             |                                          | -15.5                 |

|                       |  |       |
|-----------------------|--|-------|
| <b>TS<sub>2</sub></b> |  | 0.7   |
| <b>I-2</b>            |  | -11.1 |
| <b>TS<sub>3</sub></b> |  | 5.4   |
| <b>I-3</b>            |  | -48.8 |
| <b>TS<sub>4</sub></b> |  | -28.6 |
| <b>Product</b>        |  | -53.1 |

#### 4. Alternative mechanisms explored for the chlorination of 2-naphthol

##### b. The PIFA- $\text{AlCl}_3$ (1:2) system via the formation of $\text{PhICl}_2$

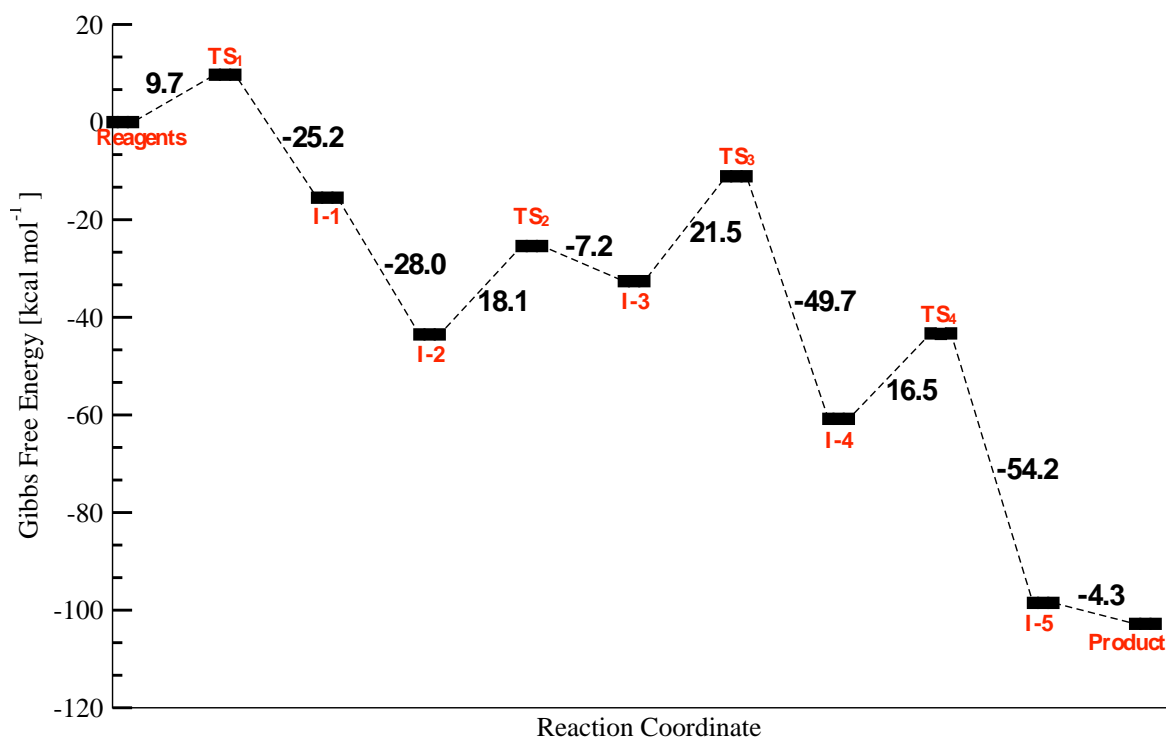

**Figure S2.** Energy profile for the chlorination of 2-naphthol in the presence of PIFA and  $\text{AlCl}_3$  (1:2) via the formation of  $\text{PhICl}_2$ . Values represent the Gibbs free energy (in kcal/mol).

**Table S2.** Structures of intermediates and transition states with their corresponding Gibbs free energies (in kcal/mol) for the chlorination of 2-naphthol in the presence of PIFA -  $\text{AlCl}_3$  (1:2) via the formation of  $\text{PhICl}_2$ .

| Step            | Intermediate (I) / Transition State (TS) | $\Delta G$ [kcal/mol] |
|-----------------|------------------------------------------|-----------------------|
| Reagents        |                                          | 0.0                   |
| TS <sub>1</sub> |                                          | 9.7                   |

|                             |  |             |
|-----------------------------|--|-------------|
| TFOAc-<br>AlCl <sub>2</sub> |  |             |
| I-1                         |  | -15.5       |
| I-2                         |  | -43.5       |
| TS <sub>2</sub>             |  | -25.4       |
| I-3                         |  | -32.6       |
| TS <sub>3</sub>             |  | -11.1       |
| I-4                         |  | -60.8       |
| TS <sub>4</sub>             |  | -44.3       |
| I-5                         |  | -98.5       |
| Product                     |  | 1-Cl-2-NpOH |



4. Alternative mechanisms explored for the chlorination of 2-naphtol  
 c. The PIDA- $\text{AlCl}_3$  (1:2) system via the formation of  $\text{PhICl}_2$

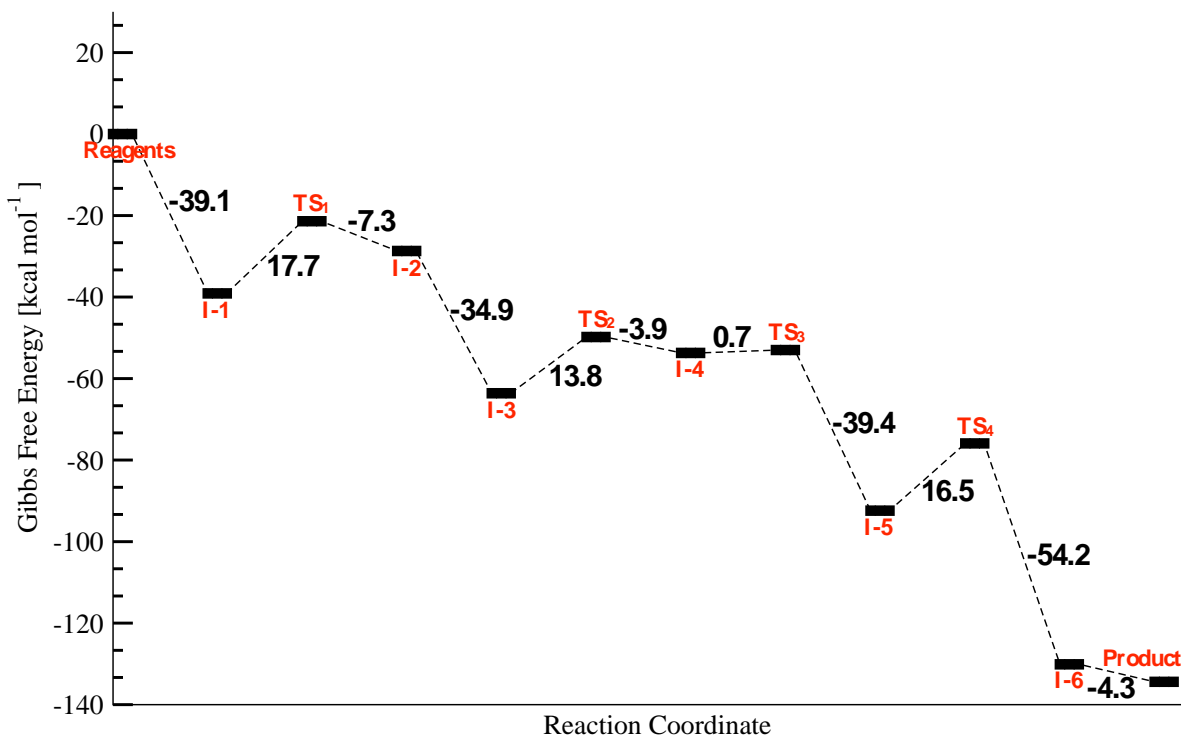

**Figure S3.** Energy profile for the chlorination of 2-naphthol in the presence of PIDA and  $\text{AlCl}_3$  (1:2) via the formation of  $\text{PhICl}_2$ . Values represent the Gibbs free energy (in kcal/mol).

**Table S3.** Structures of intermediates and transition states with their corresponding Gibbs free energies (in kcal/mol) for the chlorination of 2-naphthol in the presence of PIDA -  $\text{AlCl}_3$  (1:2) via the formation of  $\text{PhICl}_2$ .

| Step     | Intermediate (I) / Transition State (TS)                                            | $\Delta G$ [kcal/mol] |
|----------|-------------------------------------------------------------------------------------|-----------------------|
| Reagents | 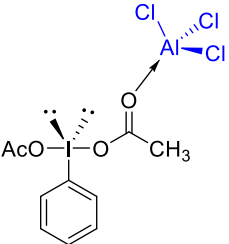 | 0.0                   |

|                 |  |       |
|-----------------|--|-------|
| I-1             |  | -39.1 |
| TS <sub>1</sub> |  | -21.4 |
| I-2             |  | -28.7 |
| I-3             |  | -63.6 |
| TS <sub>2</sub> |  | -36.5 |
| I-4             |  | -57.1 |
| TS <sub>3</sub> |  | -35.6 |
| I-5             |  | -85.4 |
| TS <sub>4</sub> |  | -68.9 |

|         |                                                                                   |        |
|---------|-----------------------------------------------------------------------------------|--------|
| I-6     | 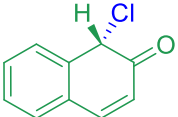 | -123.1 |
| Product |  | -127.3 |

5. Alternative mechanisms explored for the bromination of 2-naphthol  
 a. The PIFA-AlBr<sub>3</sub> (1:2) system

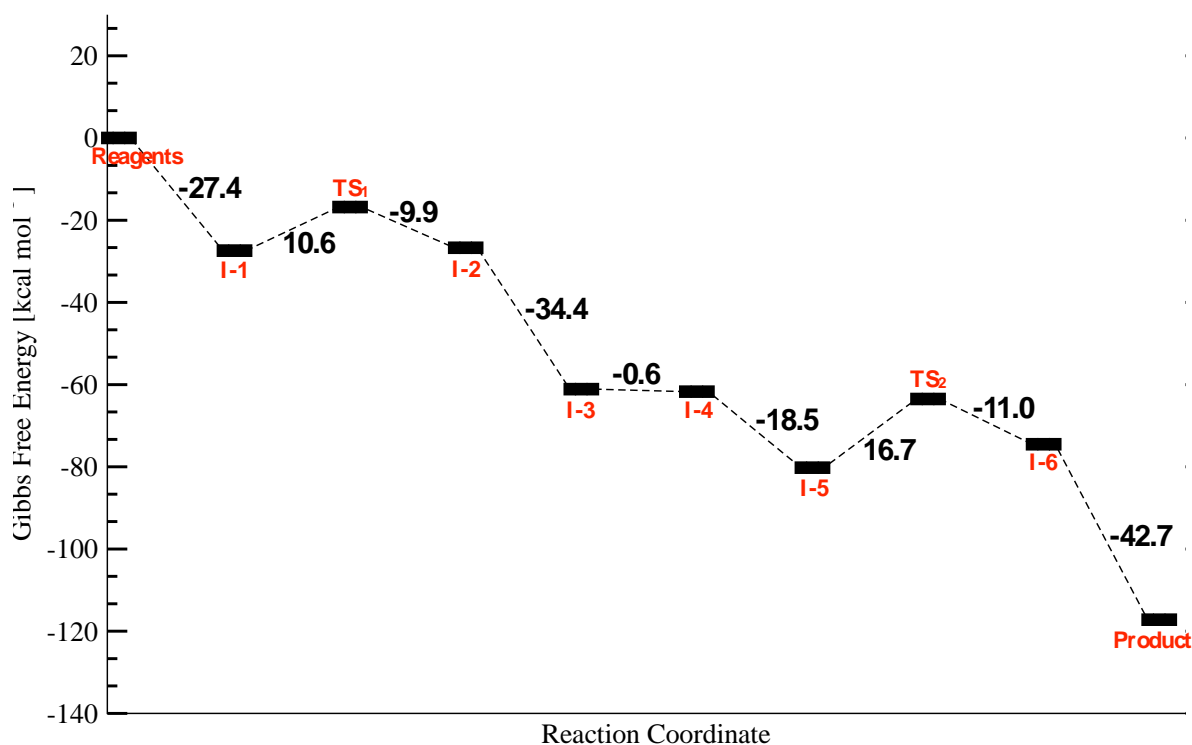

**Figure S4.** Energy profile for the bromination of 2-naphthol in the presence of PIFA and AlBr<sub>3</sub> (1:2). Values represent the Gibbs free energy (in kcal/mol).

**Table S4.** Structures of intermediates and transition states with their corresponding Gibbs free energies (in kcal/mol) for the bromination of 2-naphthol in the presence of PIFA - AlBr<sub>3</sub> (1:2).

| Step     | Intermediate (I) / Transition State (TS) | $\Delta G$ [kcal/mol] |
|----------|------------------------------------------|-----------------------|
| Reagents |                                          | 0.0                   |
| I-1      |                                          | -27.4                 |

|                         |  |       |
|-------------------------|--|-------|
| TS <sub>1</sub>         |  | -16.8 |
| TFOAc-AlBr <sub>2</sub> |  |       |
| I-2                     |  | -26.7 |
| I-3                     |  | -61.1 |
| I-4                     |  | -61.7 |
| I-5                     |  | -80.2 |
| TS <sub>2</sub>         |  | -63.5 |
| I-6                     |  | -74.5 |

|         |                                                                                                                                                                                                                                                                                                                                                                                          |             |
|---------|------------------------------------------------------------------------------------------------------------------------------------------------------------------------------------------------------------------------------------------------------------------------------------------------------------------------------------------------------------------------------------------|-------------|
| Product | 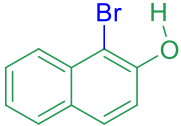 <p>The image shows the chemical structure of 1-bromo-2-naphthol. It consists of a naphthalene ring system with a bromine atom (Br) at the 1-position and a hydroxyl group (-OH) at the 2-position. The bromine atom is colored blue, and the hydrogen atom of the hydroxyl group is colored green.</p> | 1-Br-2-NpOH |
|---------|------------------------------------------------------------------------------------------------------------------------------------------------------------------------------------------------------------------------------------------------------------------------------------------------------------------------------------------------------------------------------------------|-------------|

5. Alternative mechanisms explored for the bromination of 2-naphthol  
 b. The PIFA- $\text{AlBr}_3$  (1:2) system via the formation of  $\text{PhIBr}_2$

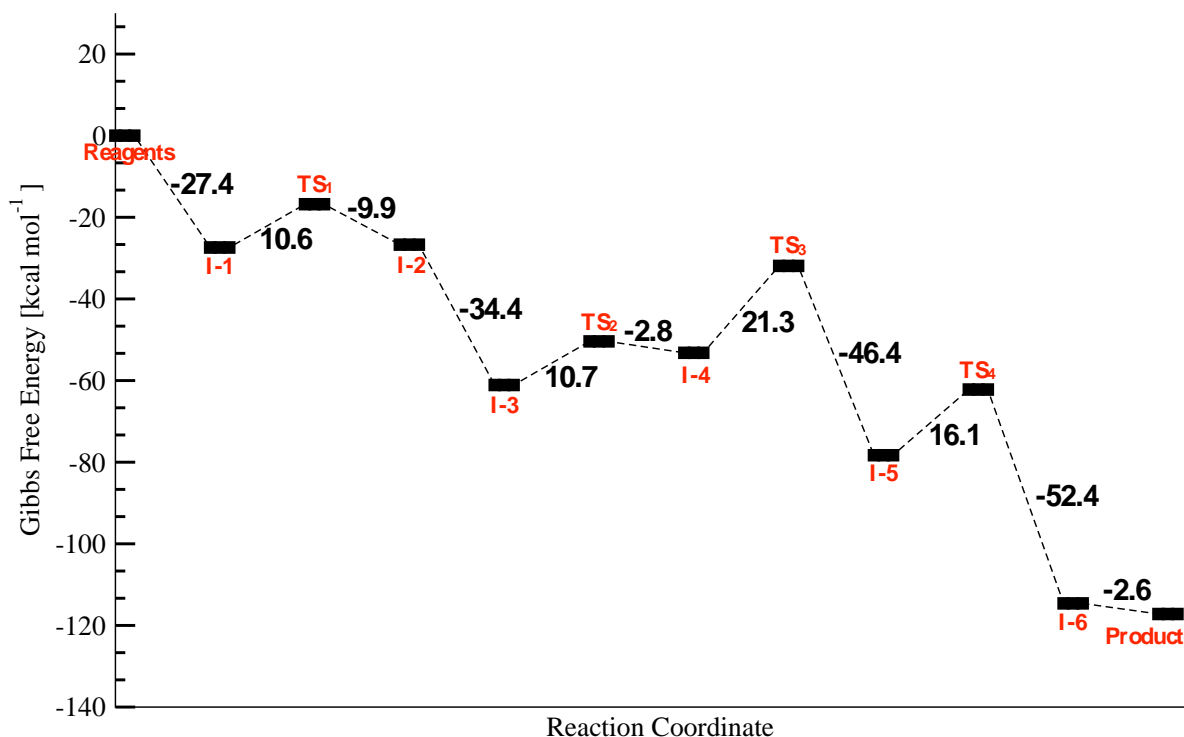

**Figure S5.** Energy profile for the bromination of 2-naphthol in the presence of PIFA and  $\text{AlBr}_3$  (1:2). Values represent the Gibbs free energy (in kcal/mol) via the formation of  $\text{PhIBr}_2$ .

**Table S5.** Structures of intermediates and transition states with their corresponding Gibbs free energies (in kcal/mol) for the chlorination of 2-naphthol in the presence of PIFA -  $\text{AlBr}_3$  (1:2), via the formation of  $\text{PhIBr}_2$ .

| Step     | Intermediate (I) / Transition State (TS) | $\Delta G$ [kcal/mol] |
|----------|------------------------------------------|-----------------------|
| Reagents |                                          | 0.0                   |
| I-1      |                                          | -27.4                 |



|                 |                                                                                     |       |
|-----------------|-------------------------------------------------------------------------------------|-------|
| TS <sub>1</sub> | 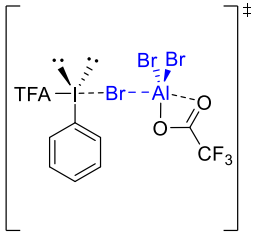   | -16.8 |
| I-2             |    | -26.7 |
| I-3             |    | -61.1 |
| TS <sub>2</sub> |   | -50.4 |
| I-4             |  | -53.2 |
| TS <sub>3</sub> |  | -31.9 |
| I-5             |  | -78.3 |

|                       |                                                                                   |        |
|-----------------------|-----------------------------------------------------------------------------------|--------|
| <b>TS<sub>4</sub></b> | 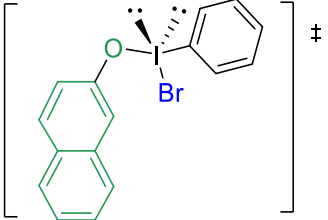 | -62.2  |
| <b>I-6</b>            |  | -114.6 |
| <b>Product</b>        |  | -117.2 |

## 5. Alternative mechanisms explored for the bromination of 2-naphthol

### c. The PIDA-AlBr<sub>3</sub> (1:2) system via the formation of PhIBr<sub>2</sub>

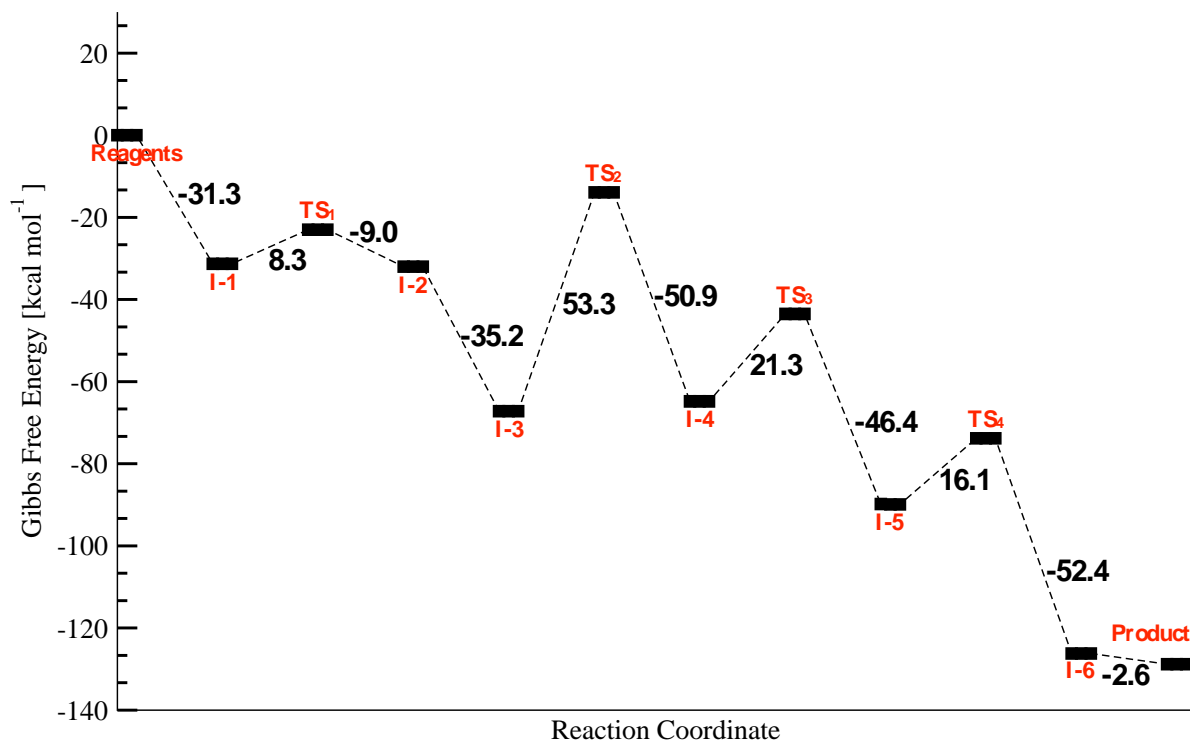

**Figure S6.** Energy profile for the bromination of 2-naphthol in the presence of PIDA and AlBr<sub>3</sub> (1:2), via the formation of PhIBr<sub>2</sub>, values represent the Gibbs free energy (in kcal/mol)

**Table S6.** Structures of intermediates and transition states with their corresponding Gibbs free energies (in kcal/mol) for the bromination of 2-naphthol in the presence of PIDA - AlBr<sub>3</sub> (1:2), via the formation of PhIBr<sub>2</sub>.

| Step            | Intermediate (I) / Transition State (TS) | ΔG [kcal/mol] |
|-----------------|------------------------------------------|---------------|
| Reagents        |                                          | 0.0           |
| I-1             |                                          | -31.3         |
| TS <sub>1</sub> |                                          | -23.0         |

|                 |                                                                                     |             |
|-----------------|-------------------------------------------------------------------------------------|-------------|
| I-2             | 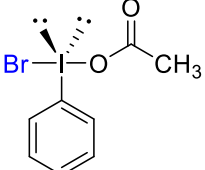   | -32.0       |
| I-3             |    | -67.2       |
| TS <sub>2</sub> |    | -13.9       |
| I-4             |   | -64.8       |
| TS <sub>3</sub> |  | -3.5        |
| I-5             |  | -89.9       |
| TS <sub>4</sub> |  | -73.8       |
| I-6             |  | -126.2      |
| Product         |  | 1-Br-2-NpOH |
